# Supplementary material for: Highly improved photocurrent of a flexible MoS2 photodetector via a backside Al metal mirror and its in- and outward folding states
Source: Royal Society of Chemistry journal article supplement (doi:10.1039/d4ra00459k), 2024-01-01
Supplement: d4ra00459k1.pdf [file d4ra00459k1.pdf]

# Supporting Information

## Highly improved photocurrent of flexible MoS<sub>2</sub> photodetector via backside Al metal mirror and its in- and out-folding

Hyewon Yoon,<sup>1</sup> and Seongin Hong<sup>1, a)</sup>

<sup>1</sup>*Department of Physics, Gachon University, Seongnam 13120, Republic of Korea*

---

<sup>a)</sup> Author to whom correspondence should be address: seongin@gachon.ac.kr

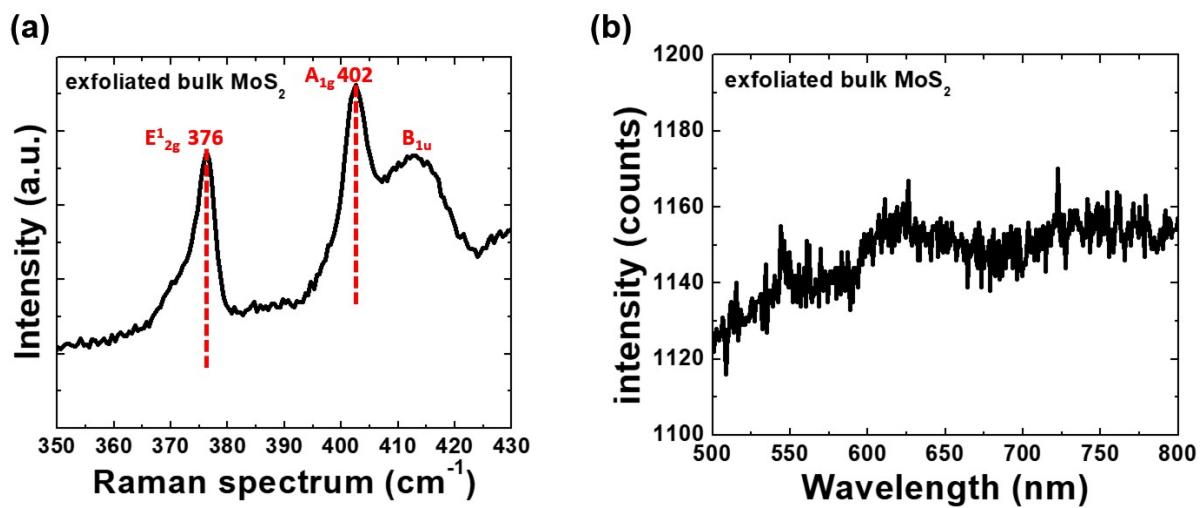

Fig. S1. (a) Raman and (b) PL spectrum of exfoliated bulk MoS<sub>2</sub>.

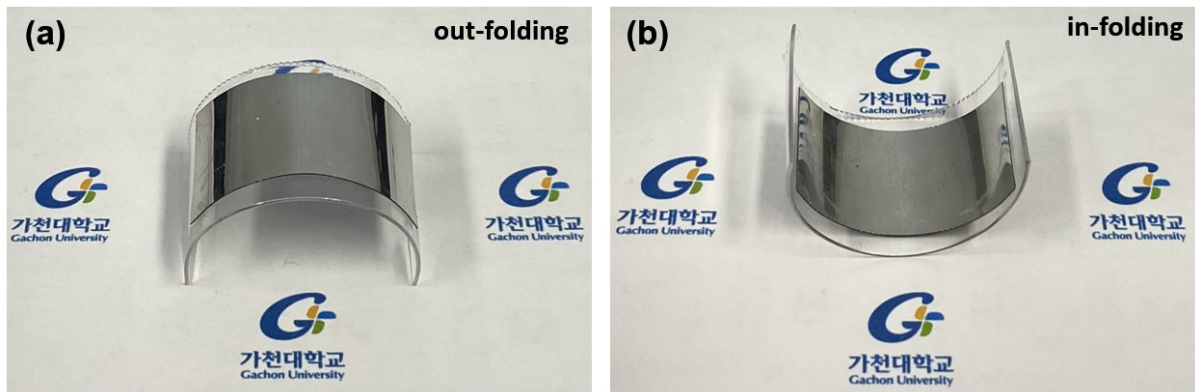

**Fig. S2.** Photographs of (a) out- and (b) in-folding state of Al metal mirror without MoS<sub>2</sub> photodetector.

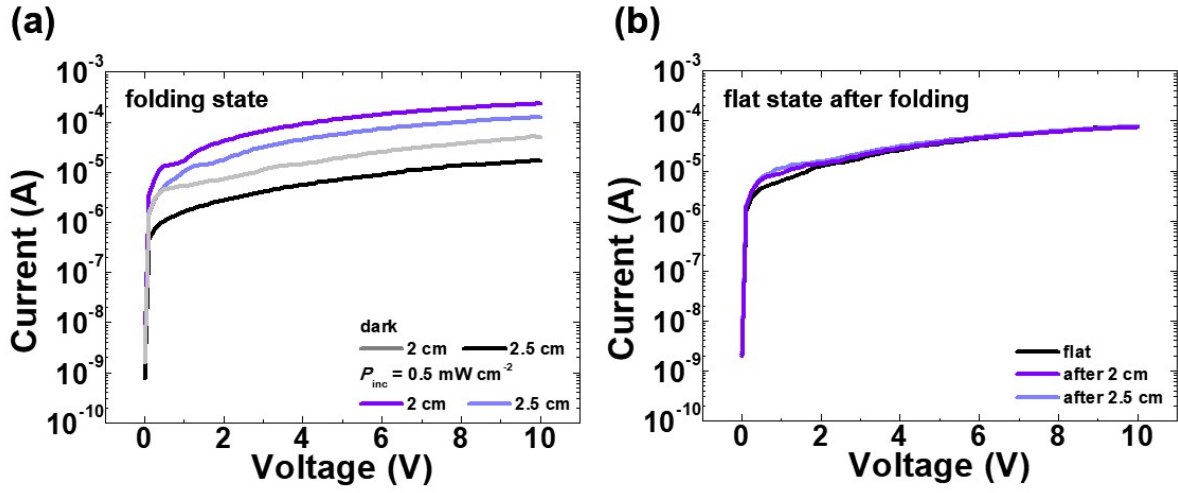

**Fig. S3.**  $I$ - $V$  characteristic of flexible MoS<sub>2</sub> photodetector with Al metal mirror (a) at different folding diameters ( $d = 2 \text{ cm}$  and  $2.5 \text{ cm}$ ) under dark and light illumination at  $P_{inc}$  of  $0.5 \text{ mW cm}^{-2}$  ( $\lambda_{ex}$  of  $406 \text{ nm}$ ) and (b) at flat state after folding different diameters.
